# Supplementary material for: Heterostructure CoFe@(Co0.5Fe0.5)S@NCNT anchored on rice husk-based hierarchical porous carbon as a bifunctional cathode catalyst for Zn–air batteries
Source: Royal Society of Chemistry journal article supplement (doi:10.1039/d4ta00555d), 2024-01-01
Supplement: d4ta00555d1.pdf [file d4ta00555d1.pdf]

## Supporting Information for

### **The heterostructure CoFe@ $(\text{Co}_{0.5}\text{Fe}_{0.5})\text{S}$ @NCNT anchored on the rice husk-based hierarchical porous carbon as a bifunctional cathode catalyst for Zn-air batteries**

Jin Yang<sup>a</sup>, Jun Shi<sup>b</sup>, Yupeng Wu<sup>a</sup>, Huimin Liu<sup>a</sup>, Zhiqiang Liu<sup>a</sup>, Qinwen You<sup>a</sup>, Xinxin Li<sup>a</sup>, Linchuan Cong<sup>a</sup>, Debo Liu<sup>a</sup>, Fangbing Liu<sup>a</sup>, Yue Jiang<sup>d</sup>, Nan Lin<sup>\*a</sup>, Wenli Zhang<sup>c,e</sup>, Haibo Lin<sup>a</sup>

<sup>a</sup> *State Key Laboratory of Inorganic Synthesis and Preparative Chemistry, College of Chemistry, Jilin University, Changchun 130012, China*

<sup>b</sup> *School of Chemical Engineering & New Energy Materials, Zhuhai College of Science and Technology, Zhuhai 519041, China*

<sup>c</sup> *Guangdong Provincial Key Laboratory of Plant Resources Biorefinery, School of Chemical Engineering & Light Industry, Guangdong University of Technology GDUT, Guangzhou 510006, China*

<sup>d</sup> *Key Laboratory of Bionic Engineering of Ministry of Education, College of Biological and Agricultural Engineering, Jilin University, Changchun 130025, China*

<sup>e</sup> *Guangdong Provincial Laboratory of Chemistry and Fine Chemical Engineering Jieyang Center, Jieyang 515200, China*

\* Corresponding authors: nanlin@jlu.edu.cn (Nan Lin<sup>\*a</sup>)

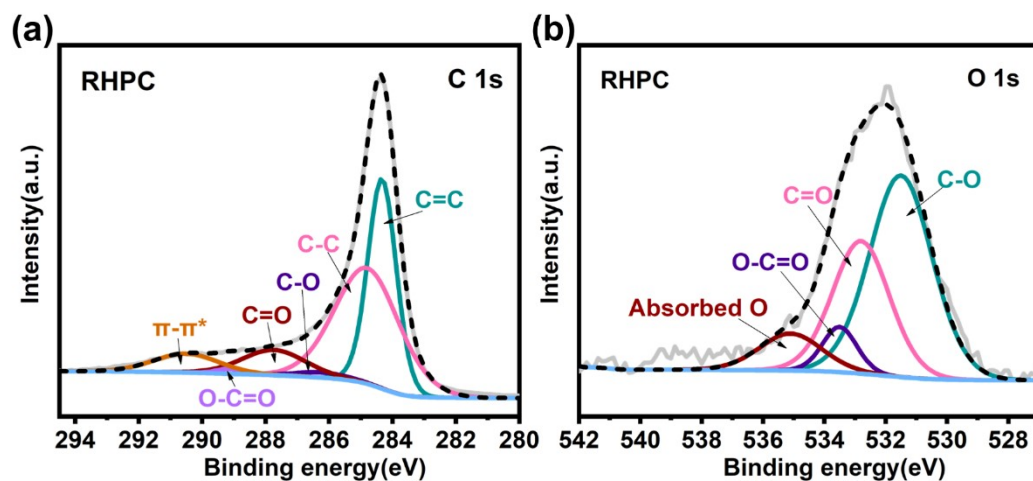

**Fig. S1** High-resolution XPS spectra of RHPC for (a) C 1s and (b) O 1s.

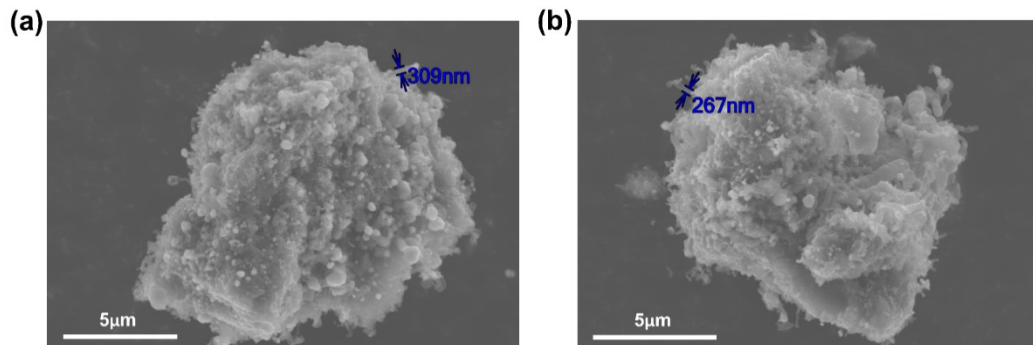

**Fig. S2** SEM images of (a) CoFe@NC and (b)  $(\text{Co}_{0.5}\text{Fe}_{0.5})\text{S@NC}$ .

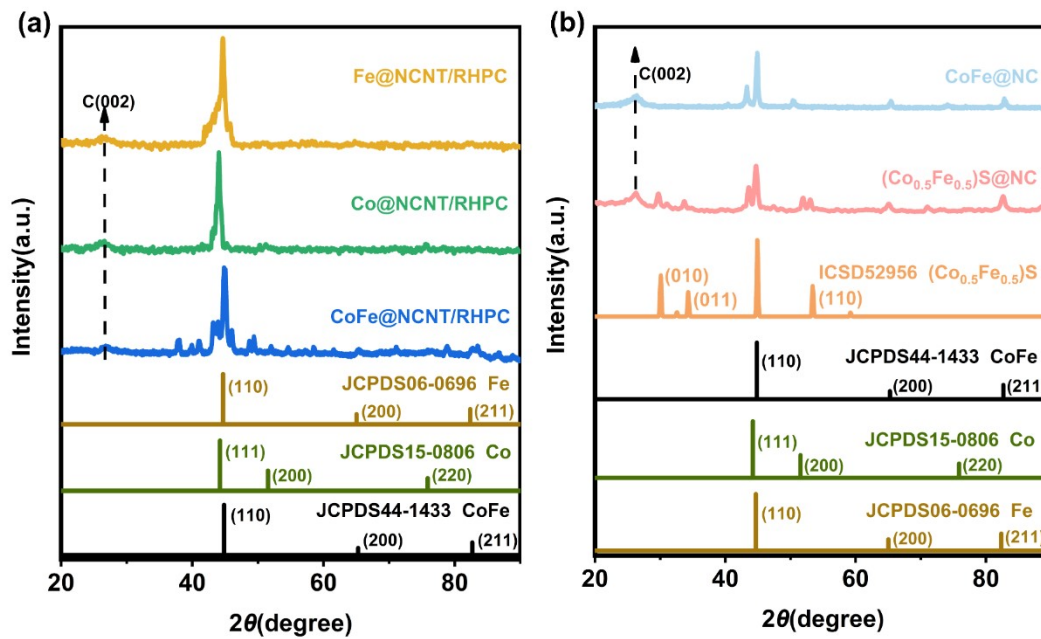

**Fig. S3** (a) XRD of Fe@NCNT/RHPC, Co@NCNT/RHPC and CoFe@NCNT/RHPC; (b) XRD of CoFe@NC and (Co<sub>0.5</sub>Fe<sub>0.5</sub>)S@NC.

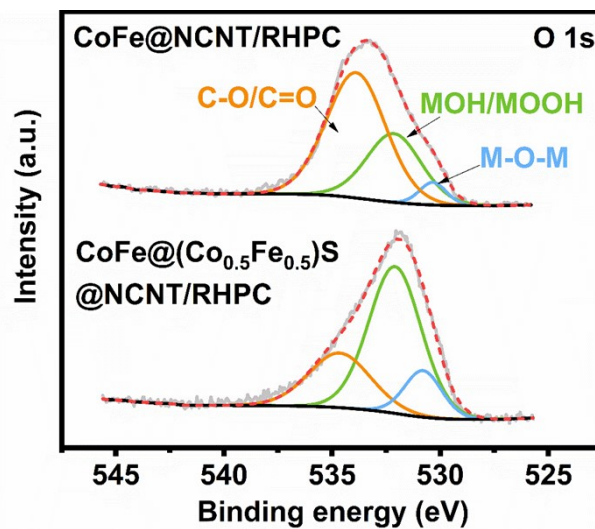

**Fig. S4** High-resolution XPS spectra of CoFe@NCNT/RHPC and CoFe@(Co<sub>0.5</sub>Fe<sub>0.5</sub>)S@NCNT/RHPC for O 1s.

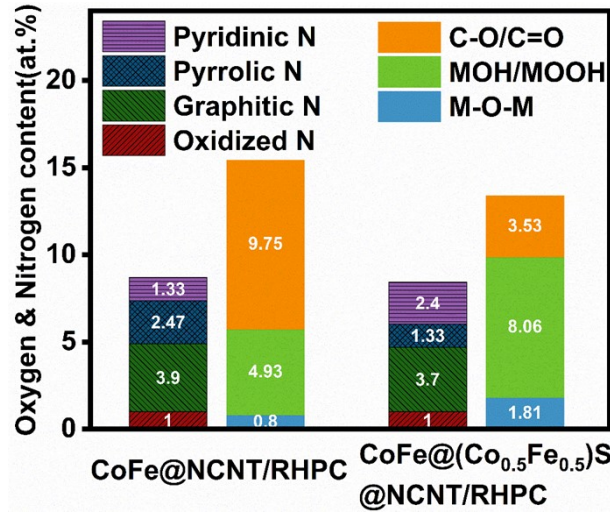

**Fig. S5** The contents of various doped N and various doped O of CoFe@NCNT/RHPC and CoFe@(Co<sub>0.5</sub>Fe<sub>0.5</sub>)S@NCNT/RHPC.

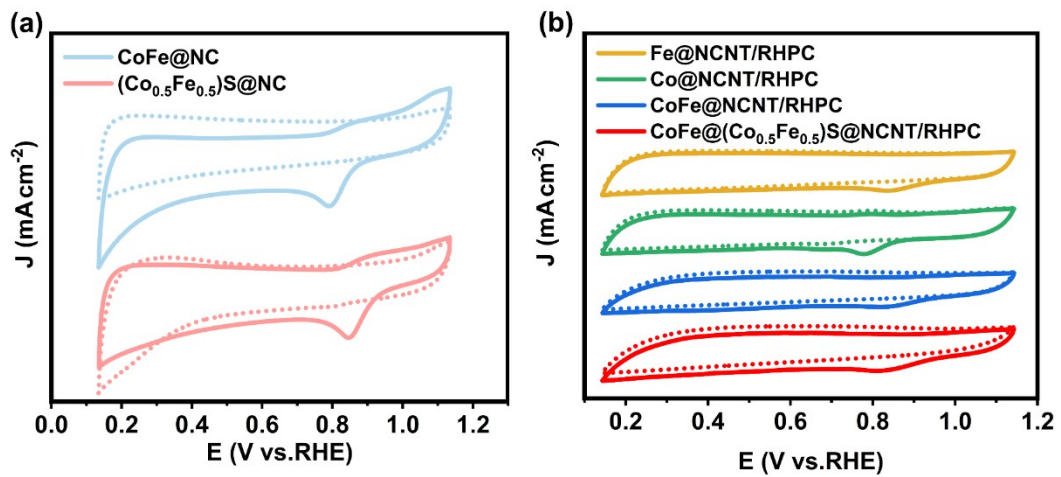

**Fig. S6** CV curves of prepared catalysts in (a) O<sub>2</sub>-saturated and (b) N<sub>2</sub>-saturated 0.1 M KOH at a scan rate of 50 mV s<sup>-1</sup>.

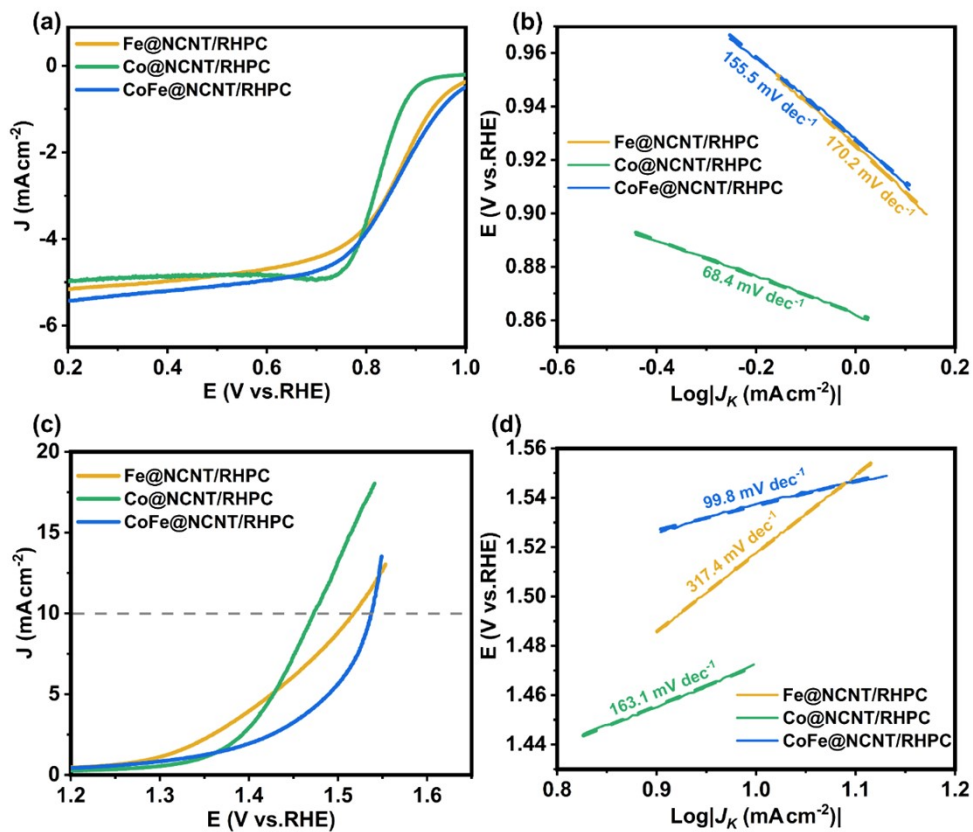

**Fig. S7** (a) LSV polarization curves for ORR at a rotation speed of 1600 rpm in O<sub>2</sub>-saturated 0.1 M KOH with a scan rate of 5 mV s<sup>-1</sup>, (b) Tafel slopes, (c) LSV polarization curves for OER with a scan rate of 5 mV s<sup>-1</sup>, (d) Tafel slopes for Fe@NCNT/RHPC, Co@NCNT/RHPC and CoFe@NCNT/RHPC.

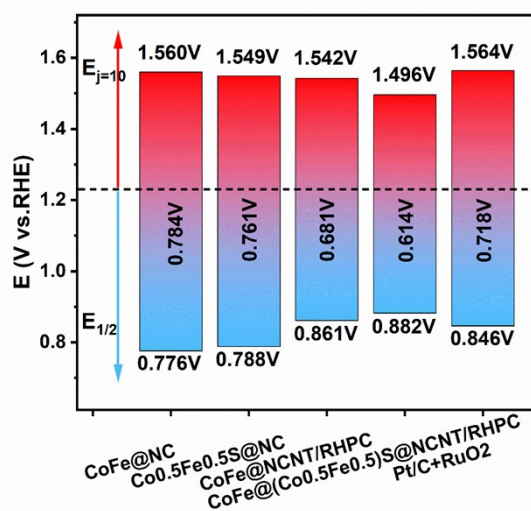

**Fig. S8** Potential gaps patterns.

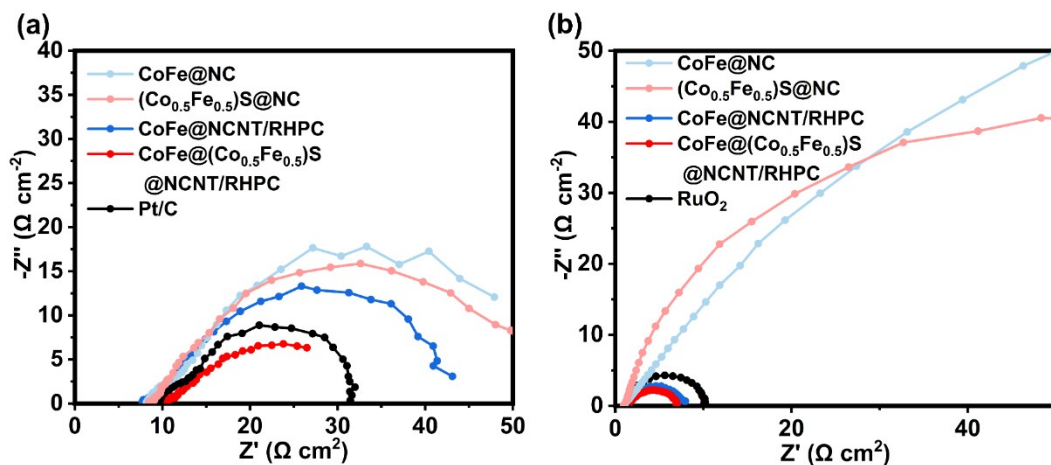

**Fig. S9** (a) EIS spectra of CoFe@NC,  $(\text{Co}_{0.5}\text{Fe}_{0.5})\text{S@NC}$ , CoFe@NCNT/RHPC, CoFe@ $(\text{Co}_{0.5}\text{Fe}_{0.5})\text{S@NCNT/RHPC}$  and Pt/C in O<sub>2</sub>-saturated 0.1 M KOH; (b) EIS spectra of CoFe@NC,  $(\text{Co}_{0.5}\text{Fe}_{0.5})\text{S@NC}$ , CoFe@NCNT/RHPC, CoFe@ $(\text{Co}_{0.5}\text{Fe}_{0.5})\text{S@NCNT/RHPC}$  and RuO<sub>2</sub> in 1 M KOH.

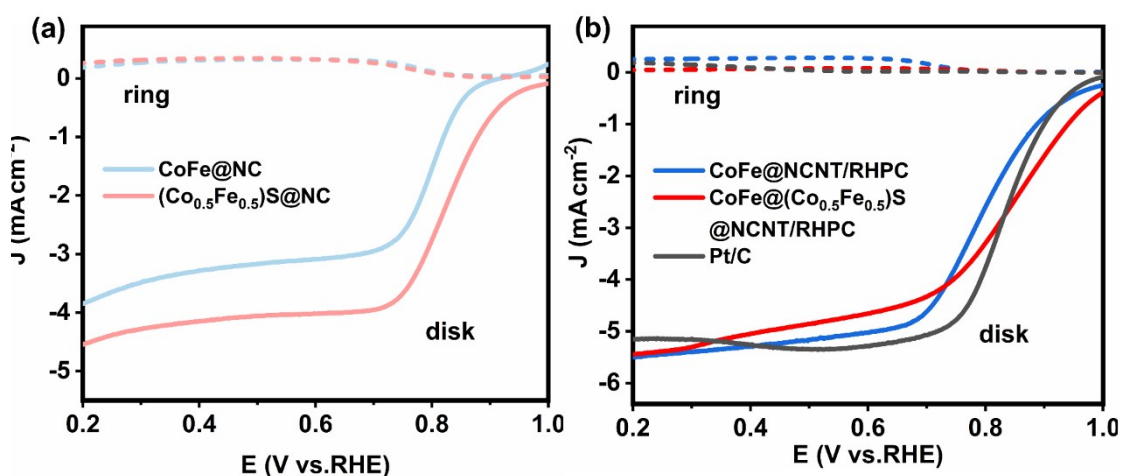

**Fig. S10** LSV curves of CoFe@NC,  $(\text{Co}_{0.5}\text{Fe}_{0.5})\text{S@NC}$ , CoFe@NCNT/RHPC, CoFe@ $(\text{Co}_{0.5}\text{Fe}_{0.5})\text{S@NCNT/RHPC}$  and Pt/C using RRDE scanned in O<sub>2</sub>-saturated 0.1 M KOH aqueous electrolyte at a rotation speed of 1600 rpm.



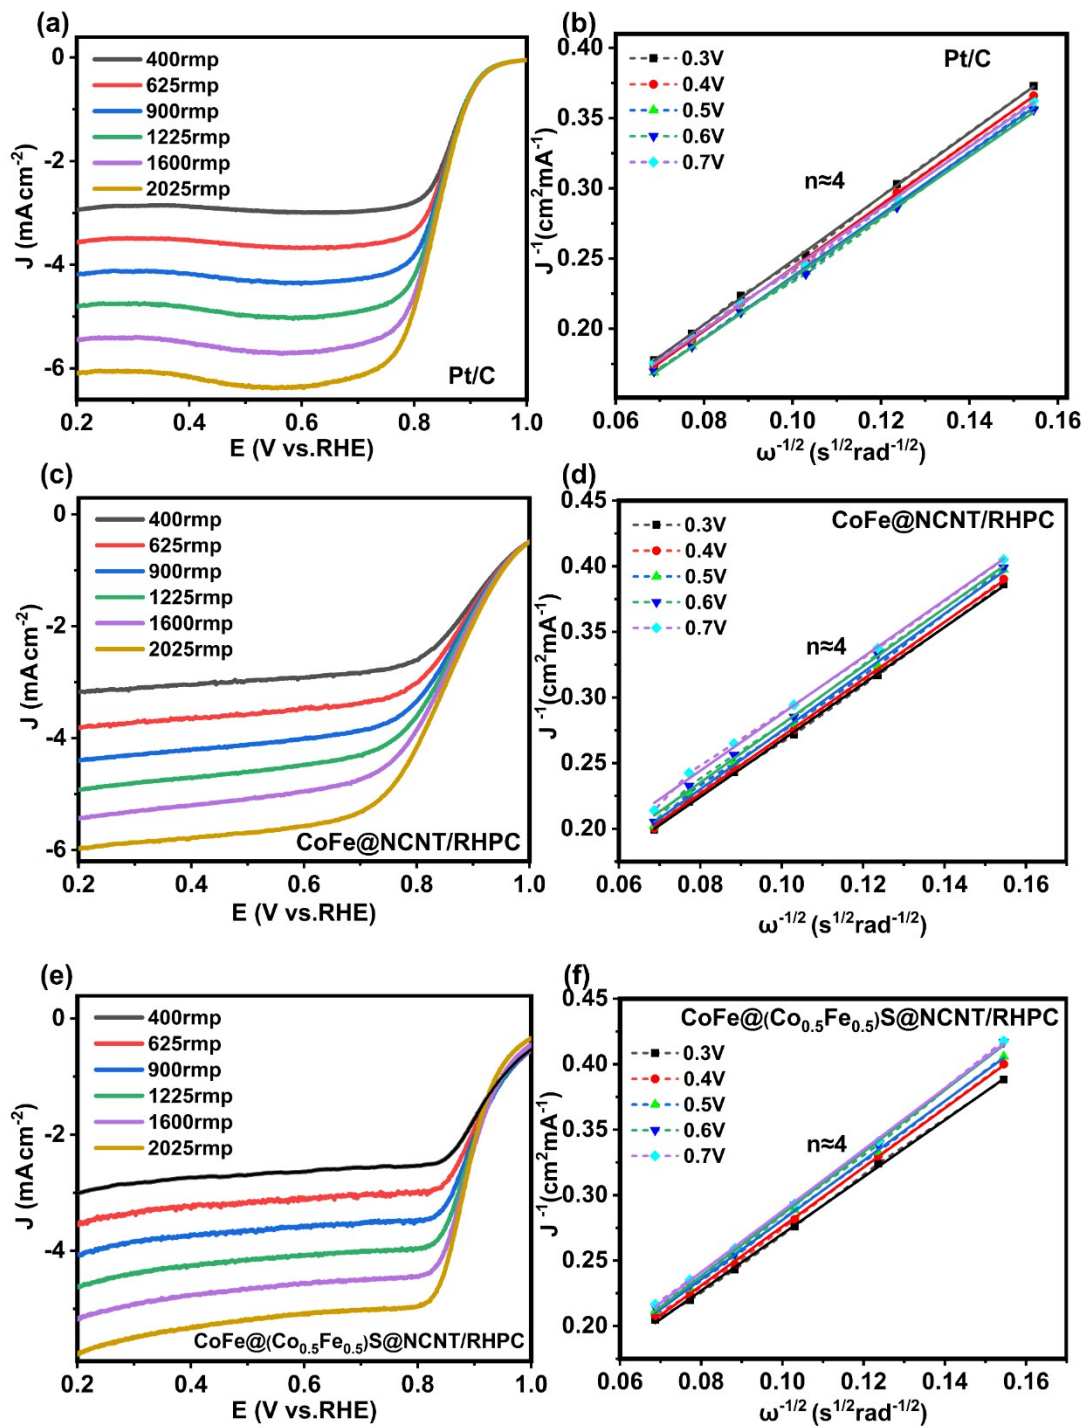

**Fig. S11** (a, c, e) LSV curves of Pt/C, CoFe@NCNT/RHPC, CoFe@(Co<sub>0.5</sub>Fe<sub>0.5</sub>)S@NCNT/RHPC at different rotating speeds; (b, d, f) shows the corresponding K-L plots at different potentials including the calculated number of electron transfer ( $n$ ) per O<sub>2</sub>.

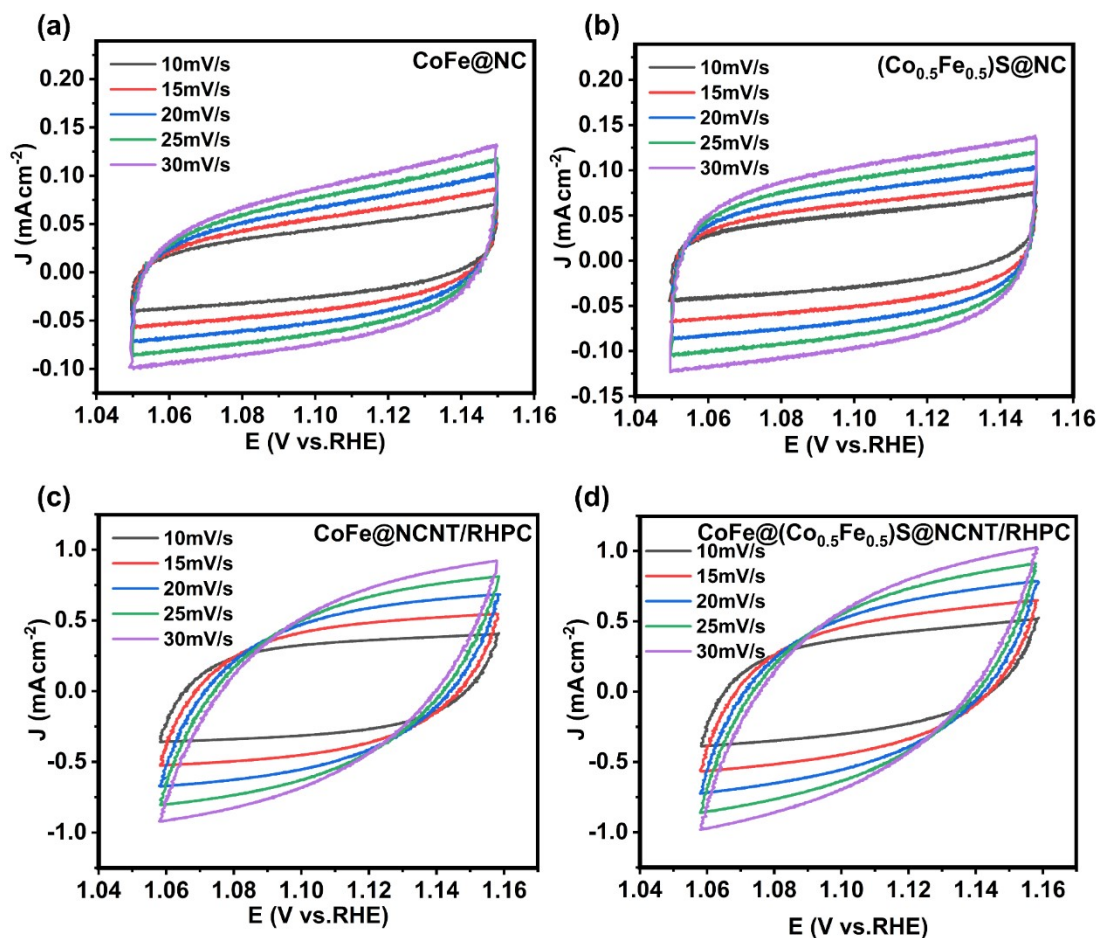

**Fig. S12** Cyclic voltammetry curves at different scanning rates (from 10 to 30 mV s<sup>-1</sup>) of (a) CoFe@NC, (b) (Co<sub>0.5</sub>Fe<sub>0.5</sub>)S@NC, (c) CoFe@NCNT/RHPC, (d) CoFe@(Co<sub>0.5</sub>Fe<sub>0.5</sub>)S@NCNT/RHPC in N<sub>2</sub>-saturated 0.1 M KOH.

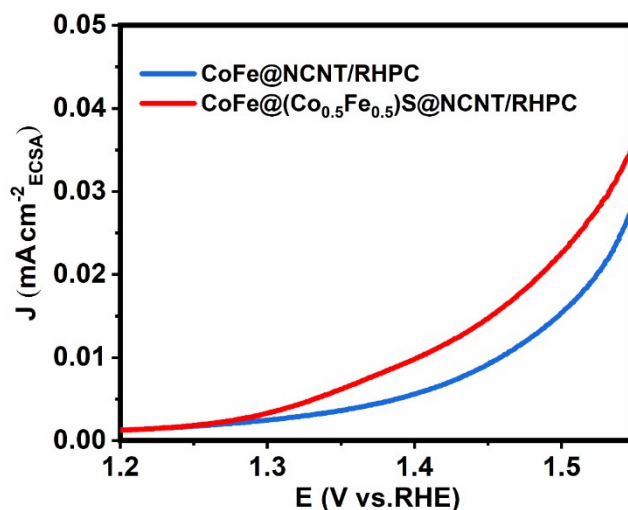

**Fig. S13** OER polarization curves normalized by ECSA.

ECSA is obtained by  $C_{dl}$ :  $ECSA = C_{dl}/C_s$ ,<sup>1</sup>  $C_s = 0.040 \text{ mF cm}^{-2}$



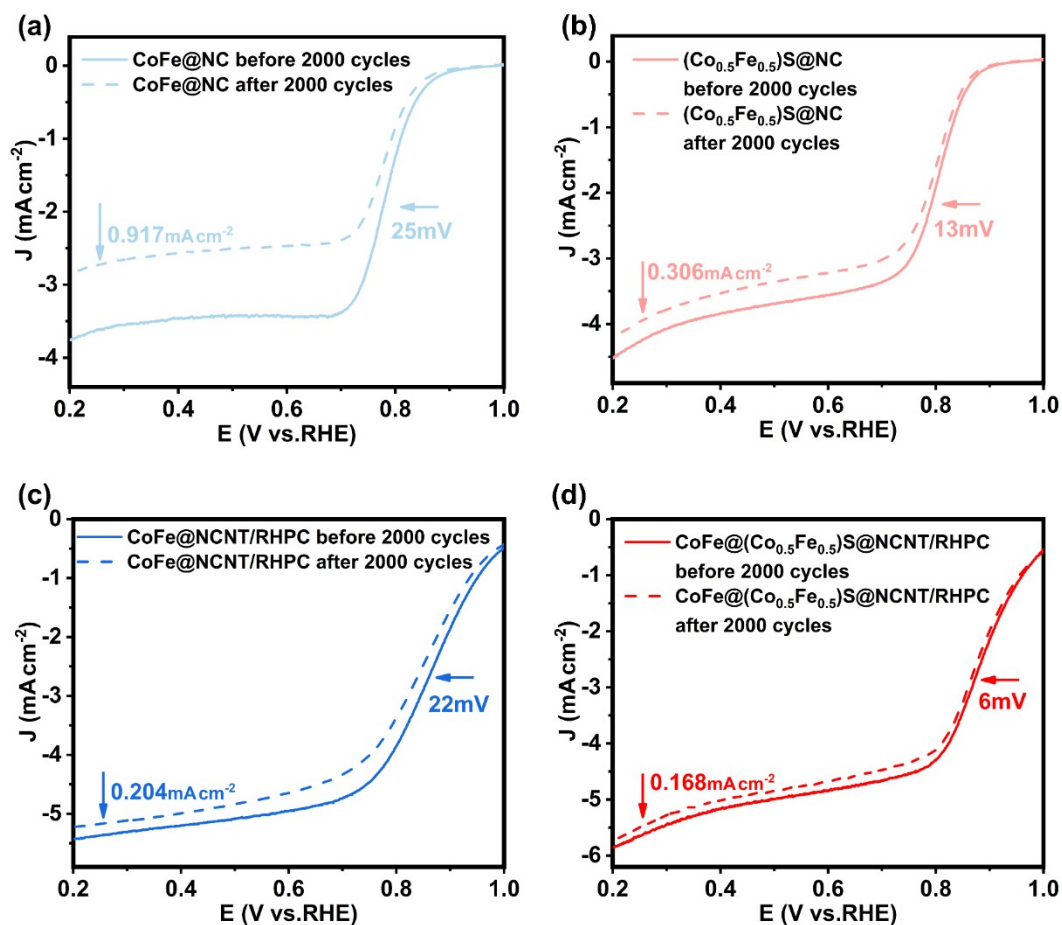

**Fig. S14** ORR polarization curves of (a) CoFe@NC, (b)  $(\text{Co}_{0.5}\text{Fe}_{0.5})\text{S}@NC$ , (c) CoFe@NCNT/RHPC, (d)  $\text{CoFe}@\text{(Co}_{0.5}\text{Fe}_{0.5})\text{S}@NCNT/RHPC$  before and after 2000 cycles in 0.1M KOH.

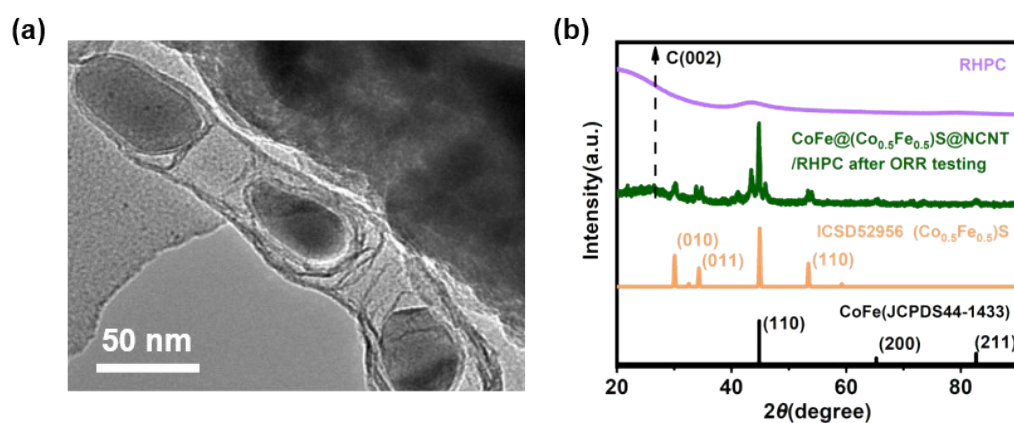

**Fig. S15** (a) TEM image and (b) XRD pattern of  $\text{CoFe}@\text{(Co}_{0.5}\text{Fe}_{0.5})\text{S}@NCNT/RHPC$  after the ORR testing in 0.1 M KOH aqueous solution.

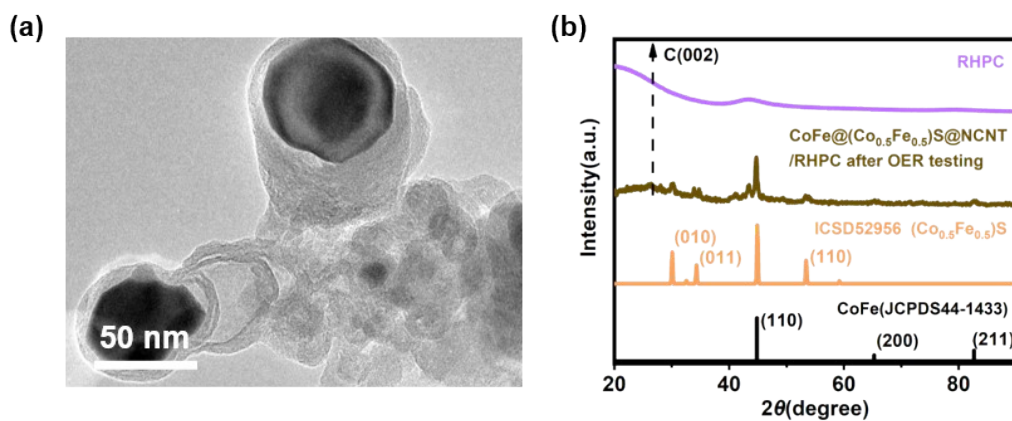

**Fig. S16** (a) TEM image and (b) XRD pattern of  $\text{CoFe}@\text{(Co}_{0.5}\text{Fe}_{0.5}\text{)S}@\text{NCNT/RHPC}$  after OER testing in 1 M KOH aqueous solution.

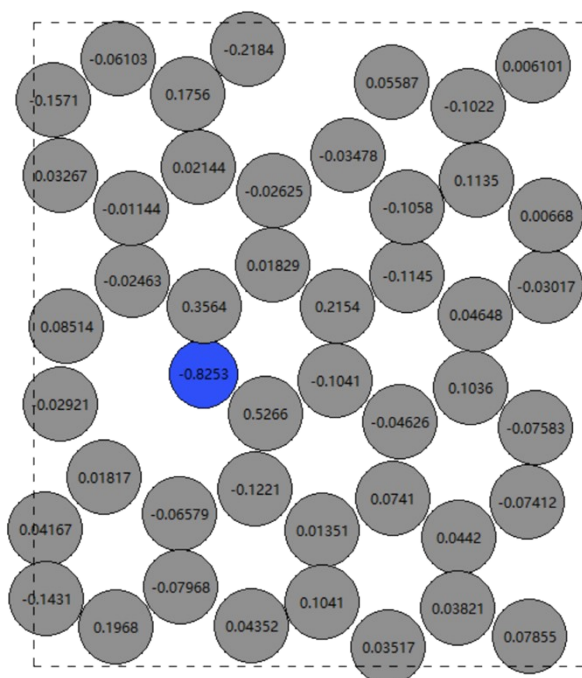

**Fig. S17** The atomic charge (the numbers) of NCNT.

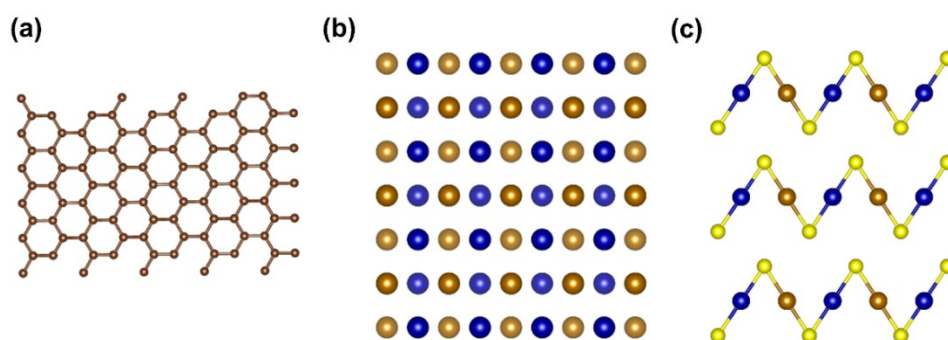

**Fig. S18** Models for (a) C(001), (b) CoFe(110), (c)  $\text{(Co}_{0.5}\text{Fe}_{0.5}\text{)S}$ (110).

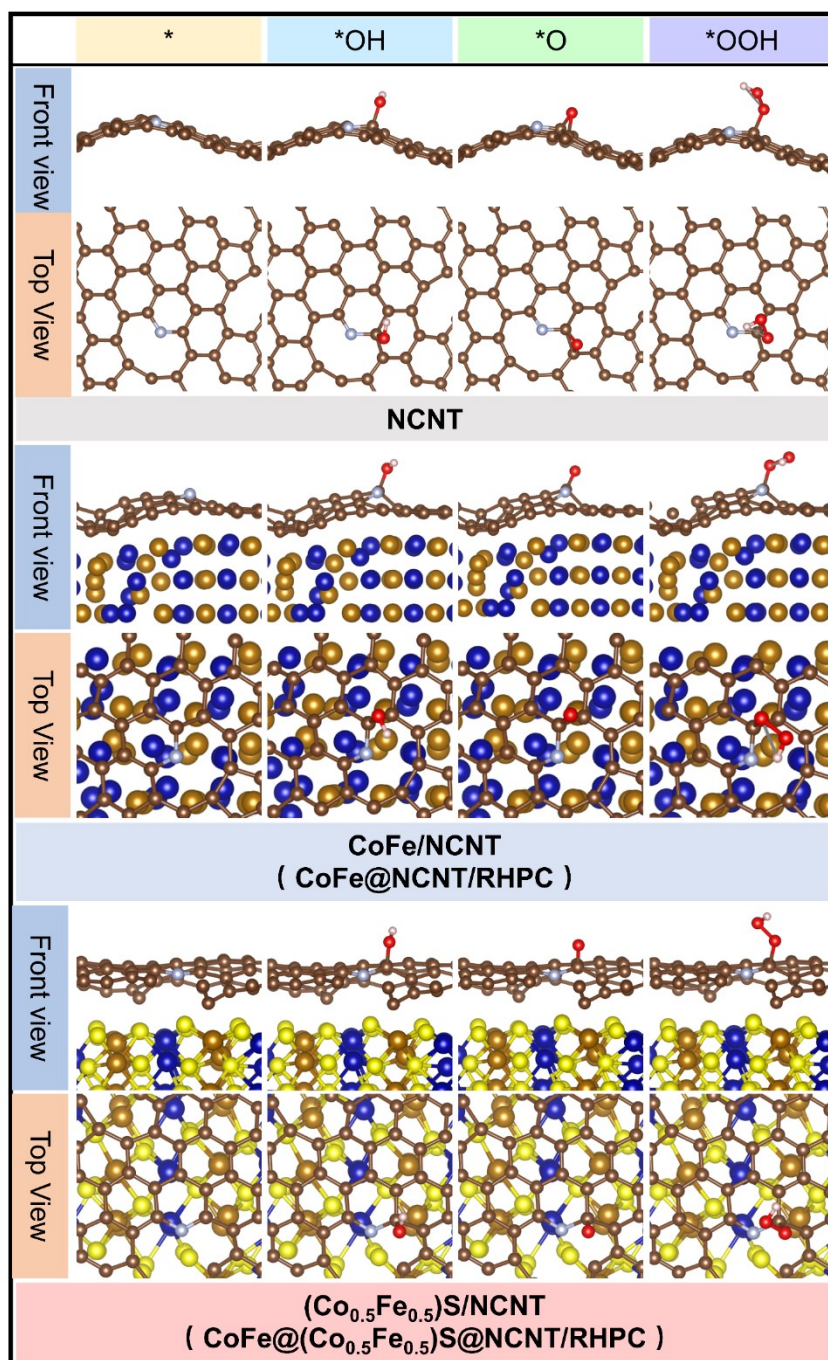

**Fig. S19** DFT optimized ORR/OER intermediate structures on C sites for NCNT, CoFe/NCNT(CoFe@NCNT/RHPC) and (Co<sub>0.5</sub>Fe<sub>0.5</sub>)S/NCNT(CoFe@(Co<sub>0.5</sub>Fe<sub>0.5</sub>)S@NCNT/RHPC).



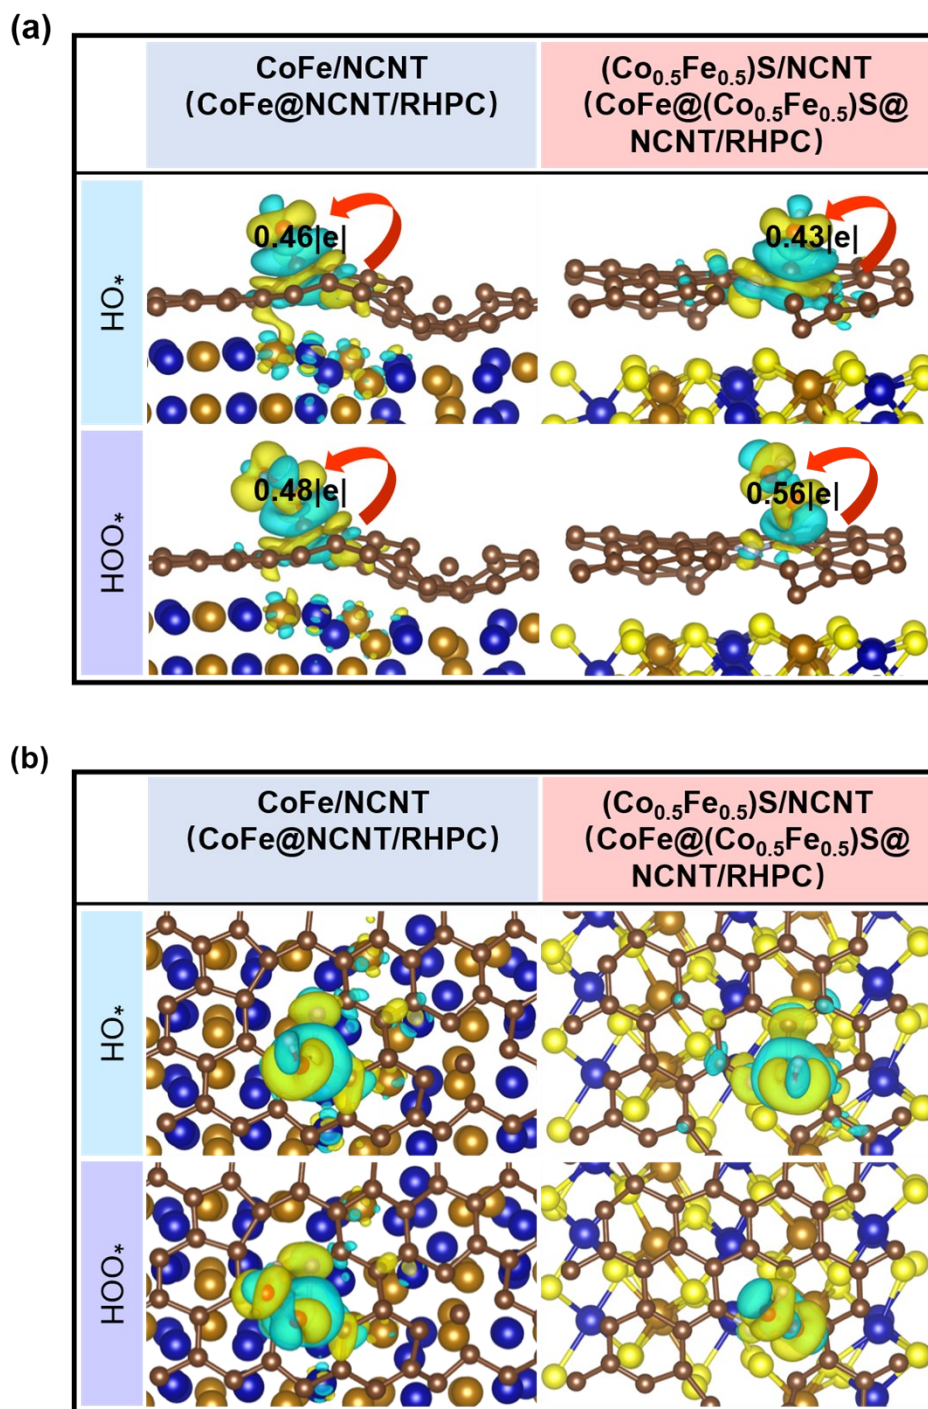

**Fig. S20** (a) Front view and (b) top view of differential electron density and bader charge of CoFe/NCNT(CoFe@NCNT/RHPC) and (Co<sub>0.5</sub>Fe<sub>0.5</sub>)S/NCNT(CoFe@(Co<sub>0.5</sub>Fe<sub>0.5</sub>)S@NCNT/RHPC) structures during adsorption of the intermediates (\*OH and \*OOH).

**Tab. S1** Specific surface area, pore volume, and pore size of RHPC, CoFe@NC,

(Co<sub>0.5</sub>Fe<sub>0.5</sub>)S@NC, CoFe@NCNT/RHPC and CoFe@(Co<sub>0.5</sub>Fe<sub>0.5</sub>)S@NCNT/RHPC.

| Samples                                                | Specific surface area (m <sup>2</sup> g <sup>-1</sup> ) | Micro pores volume (mLg <sup>-1</sup> ) | Meso pores volume (mLg <sup>-1</sup> ) | Total pores volume (mLg <sup>-1</sup> ) | Average pore size (nm) |
|--------------------------------------------------------|---------------------------------------------------------|-----------------------------------------|----------------------------------------|-----------------------------------------|------------------------|
| RHPC                                                   | 2266.3                                                  | 0.88                                    | 0.52                                   | 1.40                                    | 0.80                   |
| CoFe@NC                                                | 71.0                                                    | 0.02                                    | 0.09                                   | 0.11                                    | 1.12                   |
| (Co <sub>0.5</sub> Fe <sub>0.5</sub> )S@NC             | 29.1                                                    | 0.02                                    | 0.04                                   | 0.06                                    | 1.35                   |
| CoFe@NCNT/RHPC                                         | 495.4                                                   | 0.17                                    | 0.30                                   | 0.47                                    | 0.76                   |
| CoFe@(Co <sub>0.5</sub> Fe <sub>0.5</sub> )S@NCNT/RHPC | 510.2                                                   | 0.18                                    | 0.32                                   | 0.50                                    | 0.74                   |

**Tab. S2** The atomic composition of RHPC, CoFe@NCNT/RHPC and CoFe@(Co<sub>0.5</sub>Fe<sub>0.5</sub>)S@NCNT/RHPC obtained from XPS spectra.

| Samples                                                | C 1s (At.%) | N 1s (At.%) | S 2p (At.%) | O 1s (At.%) | Fe 2p (At.%) | Co 2p (At.%) |
|--------------------------------------------------------|-------------|-------------|-------------|-------------|--------------|--------------|
| RHPC                                                   | 96.39       | 0.86        |             | 2.75        |              |              |
| CoFe@NCNT/RHPC                                         | 83.90       | 7.26        | 0.18        | 7.60        | 0.41         | 0.66         |
| CoFe@(Co <sub>0.5</sub> Fe <sub>0.5</sub> )S@NCNT/RHPC | 81.98       | 7.57        | 1.57        | 7.27        | 0.69         | 0.93         |

**Tab. S3** Summary of the ORR/OER bifunctional performance of transition metal-based electrocatalysts reported recently.

| Catalyst                                                   | $E_{1/2}$<br>(vs. RHE) | $E_{j=10}$<br>(vs. RHE) | $\Delta E$<br>(V) | Ref.      |
|------------------------------------------------------------|------------------------|-------------------------|-------------------|-----------|
| CoFe@ $(\text{Co}_{0.5}\text{Fe}_{0.5})\text{S@NCNT/RHPC}$ | 0.882                  | 1.496                   | 0.614             | This work |
| CoFe@NCNT/RHPC                                             | 0.861                  | 1.542                   | 0.681             | This work |
| CoFe@NCS-24                                                | 0.88                   | 1.57                    | 0.69              | 2         |
| Fe,Co,N-C                                                  | 0.90                   | 1.64                    | 0.74              | 3         |
| FeCoMoS@NG                                                 | 0.83                   | 1.468                   | 0.638             | 4         |
| HHPC                                                       | 0.78                   | 1.58                    | 0.80              | 5         |
| e-N/P-C-700                                                | 0.867                  | 1.66                    | 0.76              | 6         |
| $\text{NC}_3\text{O}_4\text{@NC-2}$                        | 0.77                   | 1.50                    | 0.78              | 7         |
| Co@hNCTs-800                                               | 0.87                   | 1.63                    | 0.76              | 8         |
| Fe/Co-N/S-Cs                                               | 0.835                  | 1.515                   | 0.680             | 9         |
| $\text{Ni}_{0.5}\text{Fe}_{0.5}\text{@NCNTs}$              | 0.84                   | 1.5                     | 0.660             | 10        |
| FeNiNCNT/NCS                                               | 0.84                   | 1.59                    | 0.75              | 11        |
| $\text{Fe}_8\text{Co}_{0.2}\text{-NC-800}$                 | 0.820                  | 1.632                   | 0.812             | 12        |
| Fe- $\text{N}_x\text{@NSCST-ZL}$                           | 0.92                   | 1.71                    | 0.79              | 13        |
| CoS/Fe $_3\text{S}_4\text{@SNCP}$                          | 0.85                   | 1.50                    | 0.65              | 14        |
| SA-Fe-SNC@900                                              | 0.876                  | 1.632                   | 0.756             | 15        |
| Fe-SAs@N/S-PCSs                                            | 0.90                   | 1.68                    | 0.78              | 16        |
| Fe-N/S-CNT-GR                                              | 0.91                   | 1.60                    | 0.69              | 17        |
| $\text{Fe}_x\text{Co}_{9-x}\text{S}_8\text{-NHCS-V}$       | 0.80                   | 1.53                    | 0.73              | 18        |
| CoFe/S-N-C                                                 | 0.855                  | 1.588                   | 0.733             | 19        |
| FeCo-NCNTs                                                 | 0.90                   | 1.55                    | 0.65              | 20        |
| PB@ Met-700                                                | 0.855                  | 1.56                    | 0.705             | 21        |

**Tab. S4** EIS calculation parameters of all samples for ORR in 0.1 M KOH.

|                             | CoFe@NC | $(\text{Co}_{0.5}\text{Fe}_{0.5})\text{S@NC}$ | CoFe@NCN<br>T/RHPC | CoFe@ $(\text{Co}_{0.5}\text{Fe}_{0.5})\text{S@NCNT/RHPC}$ | Pt/C  |
|-----------------------------|---------|-----------------------------------------------|--------------------|------------------------------------------------------------|-------|
| $R_s(\Omega\text{cm}^{-2})$ | 8.50    | 8.88                                          | 8.19               | 10.59                                                      | 9.57  |
| $R_H(\Omega\text{cm}^{-2})$ | 4.68    | 3.69                                          | 3.50               | 3.46                                                       | 3.65  |
| $R_L(\Omega\text{cm}^{-2})$ | 35.84   | 33.68                                         | 28.67              | 13.64                                                      | 18.37 |
| $C_H(\text{F cm}^{-2})$     | 0.001   | 0.021                                         | 0.007              | 0.008                                                      | 0.004 |
| $C_L(\text{F cm}^{-2})$     | 0.009   | 0.060                                         | 0.052              | 0.075                                                      | 0.032 |

**Tab. S5** EIS calculation parameters of all samples for OER in 1 M KOH.

|  | CoFe@NC | $(\text{Co}_{0.5}\text{Fe}_{0.5})\text{S@NC}$ | CoFe@NCN<br>T/RHPC | CoFe@ $(\text{Co}_{0.5}\text{Fe}_{0.5})\text{S@NC}$ | $\text{RuO}_2$ |
|--|---------|-----------------------------------------------|--------------------|-----------------------------------------------------|----------------|
|--|---------|-----------------------------------------------|--------------------|-----------------------------------------------------|----------------|



|                                      | NT/RHPC |        |       |       |       |
|--------------------------------------|---------|--------|-------|-------|-------|
| $R_s(\Omega\text{cm}^{-2})$          | 0.96    | 0.99   | 1.11  | 1.26  | 1.21  |
| $R_{ct}(\Omega\text{cm}^{-2})$       | 232.80  | 103.20 | 7.34  | 6.15  | 9.17  |
| $Y_o(S\text{ sec}^n\text{ cm}^{-2})$ | 0.004   | 0.008  | 0.060 | 0.040 | 0.002 |
| n                                    | 0.683   | 0.860  | 0.769 | 0.744 | 0.935 |

**Tab. S6** Charge and discharge voltages and efficiencies of Zinc–air battery with CoFe@( $\text{Co}_{0.5}\text{Fe}_{0.5}$ )S@NCNT/RHPC at different turn numbers.

| Number of battery cycles            | 100  | 200  | 400  | 600  | 800  |
|-------------------------------------|------|------|------|------|------|
| Discharge voltage (V)               | 1.12 | 1.12 | 1.13 | 1.08 | 1.03 |
| Charge voltage (V)                  | 2.10 | 2.09 | 2.10 | 2.09 | 2.12 |
| Charge and discharge efficiency (%) | 53.2 | 53.8 | 53.8 | 51.6 | 48.5 |

**Tab. S7** Comparisons of liquid rechargeable Zn-air batteries performances for state-of-the-art catalysts.

| Catalyst                                             | Maximum power density ( $\text{mW cm}^{-2}$ ) | Catalyst Loading ( $\text{mg cm}^{-2}$ ) | Cycling Stability @ 5 mA $\text{cm}^{-2}$ (min) | Cycling Stability @ 10 mA $\text{cm}^{-2}$ (min) | Specific capacity (mAh $\text{g}^{-1}$ ) @ 10 mA $\text{cm}^{-2}$ | Ref.      |
|------------------------------------------------------|-----------------------------------------------|------------------------------------------|-------------------------------------------------|--------------------------------------------------|-------------------------------------------------------------------|-----------|
| CoFe@( $\text{Co}_{0.5}\text{Fe}_{0.5}$ )S@NCNT/RHPC | 136                                           | 1                                        |                                                 | 10000                                            | 813.6                                                             | This work |
| Fe/Co-N/S-Cs                                         | 102.63                                        | 1                                        | 1600                                            |                                                  |                                                                   | 9         |
| FeNi@NCNT/NCS                                        | 103                                           | 1                                        |                                                 |                                                  | 687.4                                                             | 11        |
| $\text{Fe}_8\text{Co}_{0.2}$ -NC-800                 | 124.9                                         | 1.14                                     | 18660                                           |                                                  | 704                                                               | 12        |
| Fe-N <sub>x</sub> @NSCST-ZL                          |                                               |                                          |                                                 |                                                  | 778                                                               | 13        |
| SA-Fe-SNC@900                                        | 218.6                                         | 2                                        | 9600                                            |                                                  | 798.7                                                             | 15        |
| Fe-N/S-CNT-GR                                        | 123                                           | 1                                        |                                                 | 18000                                            | 912                                                               | 17        |
| CoFe/S-N-C                                           | 120                                           | 1                                        |                                                 | 6000                                             | 814                                                               | 19        |
| PB@ Met-700                                          | 148                                           | 2                                        |                                                 | 5400                                             | 781                                                               | 21        |
| FeCo-NSC                                             | 152.8                                         | 2                                        |                                                 | 7200                                             | 782.1                                                             | 22        |
| FeSA-FeNC@NSC                                        | 259.88                                        |                                          |                                                 | 6000                                             | 811.03                                                            | 23        |
| MIL/ZIF-4-700 °C-NH <sub>3</sub>                     | 176.3                                         | 2                                        |                                                 | 30000                                            | 893.5                                                             | 24        |
| NSCA/FeCo                                            | 132                                           | 1                                        |                                                 | 5000                                             | 804.5                                                             | 25        |

|                                                   |        |      |       |        |    |
|---------------------------------------------------|--------|------|-------|--------|----|
| $\gamma$ -Fe <sub>2</sub> O <sub>3</sub> @CNFs-12 | 99.06  | 1    |       | 661.6  | 26 |
| FeNi-NCS-2                                        | 109.8  | 1    | 1000  | 639.71 | 27 |
| Co@N-HPCF-800                                     | 136.2  | 1    | 3000  | 723    | 28 |
| Ni SAs-NC                                         | 172    | 2    | 18000 |        | 29 |
| FeSA-S/N-C                                        | 128.35 | 0.6  | 30000 | 800.92 | 30 |
| CoP@NC-Ru                                         | 175    | 1.5  | 3000  | 780    | 31 |
| NiFeO <sub>x</sub> @VACNTs                        | 194    | 3.5  | 90000 | 800    | 32 |
| Fe/Fe <sub>3</sub> C@Fe-N <sub>x</sub> -C         | 147    | 1    | 12000 |        | 33 |
| 3D SAFe                                           | 156    | 0.48 | 4800  | 815    | 34 |
| FeNCFs-x                                          | 173    | 1    | 9900  | 717    | 35 |
| CoFe@HNSs                                         | 131.3  | 0.5  | 8400  |        | 36 |
| FeNC-900-8                                        | 124.9  | 1    |       | 816.4  | 37 |
| FeCo-N-C                                          | 196.3  | 2    | 4620  | 728.6  | 38 |
| SA-Fe-3DOMC                                       | 140    | 2    |       | 786.6  | 39 |
| Fe-NP/MNCF                                        | 111.6  | 1    | 10800 | 794.8  | 40 |
| POP-Fe/Ni-900                                     | 256    | 1.25 | 7200  | 740    | 41 |
| Fe-SAs/S <sub>2</sub> N-C/rGO                     | 127.36 |      | 37200 | 817.23 | 42 |

**Tab. S8** Gibbs free energy change ( $\Delta G$ ) of NCNT, CoFe/NCNT(CoFe@NCNT/RHPC) and (Co<sub>0.5</sub>Fe<sub>0.5</sub>)S/NCNT(CoFe@(Co<sub>0.5</sub>Fe<sub>0.5</sub>)S@NCNT/RHPC) at different potentials during OER.

| $\Delta G$<br>(eV) | U = 0 V |           |                                                  | U = 1.23 V |           |                                                  |
|--------------------|---------|-----------|--------------------------------------------------|------------|-----------|--------------------------------------------------|
|                    | NCNT    | CoFe/NCNT | (Co <sub>0.5</sub> Fe <sub>0.5</sub> )S/<br>NCNT | NCNT       | CoFe/NCNT | (Co <sub>0.5</sub> Fe <sub>0.5</sub> )S/<br>NCNT |
| <b>Step 1</b>      | 1.460   | 0.475     | 1.331                                            | 0.230      | -0.755    | 0.101                                            |
| <b>Step 2</b>      | -0.215  | 0.491     | 0.654                                            | -1.445     | -0.739    | -0.576                                           |
| <b>Step 3</b>      | 1.290   | 1.798     | 1.388                                            | 0.060      | 0.568     | 0.158                                            |
| <b>Step 4</b>      | 2.385   | 2.156     | 1.548                                            | 1.155      | 0.926     | 0.318                                            |

**Tab. S9** The bond length parameters of C-O, O-O and O-H of CoFe/NCNT(CoFe@NCNT/RHPC)

| Bond length(Å) | CoFe/NCNT-<br>OH | (Co <sub>0.5</sub> Fe <sub>0.5</sub> )S/NCNT-<br>OH | CoFe/NCNT-<br>OOH | (Co <sub>0.5</sub> Fe <sub>0.5</sub> )S/NCNT-<br>OOH |
|----------------|------------------|-----------------------------------------------------|-------------------|------------------------------------------------------|
| C-O            | 1.45             | 1.48                                                | 1.47              | 1.54                                                 |
| O-O            | -                | -                                                   | 1.47              | 1.46                                                 |
| O-H            | 0.98             | 0.98                                                | 0.99              | 0.98                                                 |

and (Co<sub>0.5</sub>Fe<sub>0.5</sub>)S/NCNT(CoFe@(Co<sub>0.5</sub>Fe<sub>0.5</sub>)S@NCNT/RHPC) absorbed \*OH and \*OOH.

## Reference

- 1 A. Roy, A. Ray, S. Saha, M. Ghosh, T. Das, M. Nandi, G. Lal, S. Das, *Int. J. Energy*

- Res.*, 2021, **45**, 16908.
- 2 H. Cheng, Y. Zhuang, C. Meng, B. Chen, J. Chen, A. Yuan, H. Zhou, *Appl. Surf. Sci.*, 2023, **607**, 154953.
  - 3 S. Sarkar, A. Biswas, E. E. Siddharthan, R. Thapa, R. S. Dey, *ACS Nano*, 2022, **16**, 7890.
  - 4 S. Ramakrishnan, J. Balamurugan, M. Vinothkannan, A. R. Kim, S. Sengodan, D. J. Yoo, *Appl. Catal., B*, 2020, **279**, 119381.
  - 5 X. Xiao, X. Li, Z. Wang, G. Yan, H. Guo, Q. Hu, L. Li, Y. Liu, J. Wang, *Appl. Catal., B*, 2020, **265**, 118603.
  - 6 K. Yuan, D. Lützenkirchen-Hecht, L. Li, L. Shuai, Y. Li, R. Cao, M. Qiu, X. Zhuang, M. K. H. Leung, Y. Chen, U. Scherf, *J. Am. Chem. Soc.*, 2020, **142**, 2404.
  - 7 Z. Wang, W. Xu, X. Chen, Y. Peng, Y. Song, C. Lv, H. Liu, J. Sun, D. Yuan, X. Li, X. Guo, D. Yang, L. Zhang, *Adv. Funct. Mater.*, 2019, **29**, 1902875.
  - 8 Q. Zhou, Z. Zhang, J. Cai, B. Liu, Y. Zhang, X. Gong, X. Sui, A. Yu, L. Zhao, Z. Wang, Z. Chen, *Nano Energy*, 2020, **71**, 104592.
  - 9 C. Li, H. Liu, Z. Yu, *Appl. Catal., B*, 2019, **241**, 95.
  - 10 C. Sun, Y.-J. Zhao, X.-Y. Yuan, J.-B. Li, H.-B. Jin, *Rare Metals*, 2022, **41**, 2616.
  - 11 J.-T. Ren, L. Chen, Y.-S. Wang, W.-W. Tian, L.-J. Gao, Z.-Y. Yuan, *ACS Sustain. Chem. Eng.*, 2020, **8**, 223.
  - 12 T. Jin, J. Nie, M. Dong, B. Chen, J. Nie, G. Ma, *Nano-micro Lett.*, 2022, **15**, 26.
  - 13 C. Li, Y. Zhang, M. Yuan, Y. Liu, H. Lan, Z. Li, K. Liu, L. Wang, *Chem. Eng. J.*, 2023, **471**, 144515.
  - 14 L. Yan, B. B. Xie, C. Yang, Y. H. Wang, J. Q. Ning, Y. J. Zhong, Y. Hu, *Adv. Energy Mater.*, 2023, **13**, 2204245.
  - 15 Z. H. Chen, X. W. Peng, Z. X. Chen, T. Z. Li, R. Zou, G. Shi, Y. F. Huang, P. Cui, J. Yu, Y. L. Chen, X. Chi, K. P. Loh, Z. Q. Liu, X. H. Li, L. X. Zhong, J. Lu, *Adv. Mater.*, 2023, **35**, 2209948.
  - 16 W. Wei, F. Lu, L. Cui, Y. Zhang, Y. Wei, L. Zong, *Carbon*, 2022, **197**, 112.
  - 17 W. Y. Noh, J. Mun, Y. Lee, E. M. Kim, Y. K. Kim, K. Y. Kim, H. Y. Jeong, J. H. Lee, H.-K. Song, G. Lee, J. S. Lee, *ACS Catal.*, 2022, **12**, 7994.
  - 18 S.-J. Li, Y. Xie, B.-L. Lai, Y. Liang, K. Xiao, T. Ouyang, N. Li, Z.-Q. Liu, *Chin. J. Catal.*, 2022, **43**, 1502.
  - 19 G. Li, Y. Tang, T. Fu, Y. Xiang, Z. Xiong, Y. Si, C. Guo, Z. Jiang, *Chem. Eng. J.*, 2022, **429**, 132174.
  - 20 S. Y. Lin, L. X. Xia, L. Zhang, J. J. Feng, Y. Zhao, A. J. Wang, *Chem. Eng. J.*, 2021, **424**.
  - 21 Y. B. Lian, K. F. Shi, H. J. Yang, H. Sun, P. W. Qi, J. Ye, W. B. Wu, Z. Deng, Y. Peng, *Small*, 2020, **16**, 1907368.
  - 22 Y. Wu, C. Ye, L. Yu, Y. Liu, J. Huang, J. Bi, L. Xue, J. Sun, J. Yang, W. Zhang, X. Wang, P. Xiong, J. Zhu, *Energy Storage Mater.*, 2022, **45**, 805.
  - 23 W. J. Zhai, S. H. Huang, C. B. Lu, X. N. Tang, L. B. Li, B. Y. Huang, T. Hu, K. Yuan, X. D. Zhuang, Y. W. Chen, *Small*, 2022, **18**, 2107225.
  - 24 R. Song, L. Guan, L. Fan, X. Miao, H. Zhang, J. Cheng, T. Zhou, C. Ni and J. Fan, *J. Energy Storage*, 2024, **80**, 110345.

25. Y. Zhang, X. Zhang, Y. Li, J. Wang, S. Kawi and Q. Zhong, *Nano Res.*, 2023, **16**, 6870-6880.
26. Z. Yao, Y. Li, D. Chen, Y. Zhang, X. Bao, J. Wang and Q. Zhong, *Chem. Eng. J.*, 2021, **415**, 129033.
27. Z. Yao, D. Chen, Y. Li, Q. Lyu, J. Wang and Q. Zhong, *Int. J. Hydrogen Energy*, 2022, **47**, 984-992.
28. Y. Zhang, Q. He, Z. Chen, Y. Chi, J. Sun, D. Yuan and L. Zhang, *J. Energy Chem.*, 2023, **76**, 117-126.
29. H. Jiang, J. Xia, L. Jiao, X. Meng, P. Wang, C.-S. Lee and W. Zhang, *Appl. Catal., B*, 2022, **310**, 121352.
30. S. Zhou, C. Chen, J. Xia, L. Li, X. Qian, F. Yin, G. He, Q. Chen and H. Chen, *Small*, 2024, DOI: 10.1002/sml.202310224, e2310224-e2310224.
31. M. M. Kumar, C. Aparna, A. K. Nayak, U. V. Waghmare, D. Pradhan and C. R. Raj, *ACS Appl. Mater. Interfaces*, 2024, **16**, 3542-3551.
32. Y. Yan, Y. Xu, B. Zhao, Y. Xu, Y. Gao, G. Chen, W. Wang and B. Y. Xia, *J. Mater. Chem. A*, 2020, **8**, 5070-5077.
33. L. B. Zong, X. Chen, S. L. Liu, K. C. Fan, S. M. Dou, J. Xu, X. X. Zhao, W. J. Zhang, Y. W. Zhang, W. C. Wu, F. H. Lu, L. X. Cui, X. F. Jia, Q. Zhang, Y. Yang, J. Zhao, X. Li, Y. D. Deng, Y. N. Chen and L. Wang, *J. Energy Chem.*, 2021, **56**, 72-79.
34. T. Jin, J. Nie, M. Dong, B. Chen, J. Nie and G. Ma, *Nano-Micro Lett.*, 2022, **15**, 26.
35. Y. Ma, D. Chen, D. D. Zhang, H. Yu, Y. P. Zheng, W. J. Li, L. Wang, Q. Liu and W. Y. Yang, *Carbon*, 2022, **187**, 196-206.
36. X. T. Zhang, Z. Y. Zhu, Y. B. Tan, K. Qin, F. X. Ma and J. H. Zhang, *Chem. Commun.*, 2021, **57**, 2049-2052.
37. R. Hao, S. Gu, J. Chen, Z. Wang, Q. Gan, Z. Wang, Y. Huang, P. Liu, K. Zhang, K. Liu, C. Liu and Z. Lu, *Mater. Today Energy*, 2021, **21**, 100826.
38. D. Wang, H. Xu, P. Yang, X. Lu, J. Ma, R. Li, L. Xiao, J. Zhang and M. An, *J. Mater. Chem. A*, 2021, **9**, 13678-13687.
39. P. Li, X. Qi, L. Zhao, J. Wang, M. Wang, M. Shao, J. S. Chen, R. Wu and Z. Wei, *J. Mater. Chem. A*, 2022, **10**, 5925-5929.
40. T. W. Wang, Q. Zhang, K. Lian, G. C. Qi, Q. Liu, L. G. Feng, G. Z. Hu, J. Luo and X. J. Liu, *J. Colloid Interface Sci.*, 2024, **655**, 176-186.
41. P. X. Weng, Y. Q. Guo, K. Wu, X. Wang, G. Q. Huang, H. Lei, Y. F. Yuan, W. G. Lu and D. Li, *J. Mater. Chem. A*, 2023, **11**, 12194-12201.
42. L. Li, N. Li, J. W. Xia, S. L. Zhou, X. Y. Qian, F. X. Yin, G. H. Dai, G. Y. He and H. Q. Chen, *Nano Res.*, 2023, **16**, 9416-9425.
